# Supplementary material
Source: publisher figshare collection journal article supplement (https://gsajournals.figshare.com/ndownloader/files/12776408)
Supplement: Supplementary file 1 [file 12776408]

Table S10. Output data for the mini-core population
Marker	Chr	Pos	(-)log10(p)
2_37329	1	74363	0.954520547
2_24641	1	78762	1.599807511
2_34948	1	84686	0.301238507
2_49308	1	98555	0.301238507
2_37858	1	126183	0.301238507
2_26334	1	143044	0.720082223
2_35739	1	155369	0.639293011
2_37150	1	155652	0.44515967
2_35740	1	157214	0.301238507
2_35055	1	162717	0.301238507
2_37418	1	188991	0.301238507
2_45815	1	210070	2.055024092
2_19235	1	224200	0.678235919
2_36126	1	230054	0.189505371
2_36165	1	231865	0.737406542
2_34231	1	270263	0.8610976
2_29021	1	270648	0.922850205
2_28393	1	276025	0.932817514
2_28392	1	280357	0.959991364
2_25695	1	315029	0.525477797
2_32941	1	339578	0.844603226
2_45250	1	346817	0.894557945
2_28734	1	356475	0.852478256
2_35529	1	360661	0.193833598
2_27984	1	385444	0.490891607
2_35267	1	387093	0.127464978
2_36183	1	401958	0.649422508
2_10499	1	416168	0.001213375
2_35347	1	416359	0.649422508
2_35659	1	435177	0.383461473
2_35349	1	439351	0.620060277
2_55126	1	457467	0.56372601
2_16623	1	528696	0.56372601
2_16624	1	529778	0.56372601
1_0052	1	532169	0.529398426
2_19545	1	532675	0.529398426
2_34702	1	533987	0.166852888
2_34703	1	534402	0.407789922
2_31763	1	535886	0.58405892
2_52089	1	582850	0.58405892
2_10342	1	585519	0.58405892
2_10341	1	587276	0.58405892
2_53971	1	600333	0.041321467
2_33997	1	633858	0.163346806
2_29974	1	638910	0.072629637
2_29788	1	640804	0.191802536
2_23877	1	645231	0.917933066
2_06814	1	649381	0.163346806
2_27247	1	649902	0.163346806
2_47829	1	651508	0.917933066
2_18842	1	660293	0.512790898
2_12556	1	674116	0.011445502
2_12557	1	674829	0.874713967
2_46478	1	682429	0.552919528
2_15687	1	686295	0.552919528
2_15686	1	687005	0.163346806
2_26938	1	698250	0.120950019
2_26939	1	703322	0.124082573
2_07404	1	726992	0.638140008
2_05939	1	743397	0.369551784
2_28672	1	747204	0.332360294
1_0054	1	747908	0.46967221
2_10941	1	747908	0.46967221
2_53453	1	756741	0.427488524
2_03904	1	759342	0.427488524
2_03903	1	760013	0.427488524
2_19281	1	776267	0.110748735
2_39475	1	791795	0.610072353
2_19306	1	795098	0.132844939
2_19305	1	795395	0.571913824
2_54157	1	840388	0.370814742
1_0206	1	843319	0.379541208
2_15094	1	843962	0.535748978
2_15095	1	845015	0.571962447
2_55330	1	853075	0.009208436
2_38890	1	864854	0.532865659
2_38891	1	868994	0.532865659
2_01875	1	870062	0.375284857
2_01874	1	870479	0.571962447
2_51227	1	872294	0.571962447
2_37830	1	874333	0.532865659
2_55536	1	876448	0.508344206
2_44196	1	878890	0.060855301
2_23727	1	885161	0.209609267
2_23726	1	885456	0.205435279
2_15984	1	890439	0.110748735
2_15985	1	890841	0.110748735
2_30157	1	902056	0.532865659
2_30156	1	903283	0.571962447
2_15789	1	903717	0.532865659
2_15788	1	904136	0.532865659
2_19475	1	929401	0.110748735
2_30940	1	930042	0.110748735
2_21767	1	931457	0.491497215
2_21766	1	931947	0.263866545
2_11058	1	935850	0.209609267
2_11059	1	936527	0.10835663
2_20999	1	942073	0.971957705
2_20998	1	942705	0.191323238
2_50940	1	952075	0.364204718
2_44927	1	960309	0.048157555
1_0364	1	967616	0.17131433
2_18717	1	967616	0.194118706
2_30746	1	967900	0.104444865
2_51363	1	975368	0.129596095
2_19327	1	991646	0.441387417
2_50674	1	994405	0.130868062
2_28005	1	999940	0.69231146
2_34088	1	1000065	0.325607379
2_28006	1	1000671	0.497846107
2_28007	1	1001914	0.004931073
2_14096	1	1002727	0.884289662
2_33013	1	1002788	0.884289662
2_24160	1	1013508	0.350567777
2_24159	1	1015181	0.325607379
2_02230	1	1034587	0.126284236
2_02229	1	1035046	0.366854861
2_02232	1	1038625	0.145153704
2_02231	1	1040734	0.175854633
2_16693	1	1048214	0.286240731
2_16692	1	1048987	0.124203953
2_27260	1	1068979	0.035019502
2_24563	1	1071545	0.456515543
2_00307	1	1072347	0.035019502
2_19413	1	1080711	0.48691564
2_30917	1	1080969	0.177531158
2_00192	1	1085896	0.286240731
2_00193	1	1086531	0.494253277
2_29813	1	1090128	0.479581977
2_29815	1	1091036	0.217183516
2_29816	1	1091427	0.286240731
2_29817	1	1091789	0.115969713
2_14666	1	1092721	0.494253277
2_05028	1	1104649	0.06823203
2_05027	1	1106876	0.786482243
2_51570	1	1110634	0.162556772
2_23018	1	1111438	0.22964882
2_23019	1	1111997	0.373064554
2_55445	1	1128064	0.46977468
2_29925	1	1129516	0.30084763
1_0888	1	1138175	0.459933434
1_1147	1	1140777	0.012704742
2_13839	1	1146126	0.664903326
2_13840	1	1147013	0.348712292
2_06455	1	1151025	0.528532259
2_06456	1	1151355	0.570926331
2_06457	1	1153072	0.28085938
2_09732	1	1163762	0.286240731
2_09733	1	1164047	0.044398829
2_09734	1	1165009	0.162556772
2_09735	1	1165307	0.335367425
2_34271	1	1175183	0.915280768
2_29277	1	1175991	0.006065829
2_49836	1	1178051	0.489307569
2_12947	1	1180695	1.014393917
2_45911	1	1182184	0.011418749
2_45907	1	1197383	0.979431565
2_33658	1	1217256	1.068949153
2_00606	1	1217860	1.331055266
2_00605	1	1220476	1.493224463
2_46818	1	1225005	1.192329699
2_13585	1	1231004	0.160333443
2_22980	1	1240135	1.280254507
2_11400	1	1268459	0.400979826
2_28825	1	1269293	0.925476112
2_19493	1	1272506	0.69439071
2_19511	1	1291947	0.955264303
2_36000	1	1291987	0.060845308
2_30310	1	1306765	1.189834715
2_29792	1	1314547	0.926978546
2_24930	1	1323314	0.9879224
2_00801	1	1330630	0.047420641
2_24774	1	1331713	0.732663975
2_20605	1	1340242	0.579582131
2_18267	1	1347659	0.430403732
2_18268	1	1348430	0.572968548
2_06685	1	1376831	0.716359611
2_32689	1	1376990	0.56050941
2_07063	1	1382179	0.069320896
2_07062	1	1382517	0.793120178
2_33662	1	1387415	0.680602426
2_24732	1	1387893	0.00517273
2_32320	1	1389358	0.009385913
2_24733	1	1392458	0.836898285
2_50309	1	1408243	0.816274742
2_06691	1	1418630	0.699687182
2_06692	1	1420758	0.790779977
2_42760	1	1434861	1.182104243
2_00679	1	1436801	1.053400375
2_32369	1	1443355	0.994562077
2_07450	1	1444862	1.11850122
2_19485	1	1452783	0.833925283
2_09371	1	1462003	1.214314332
2_28136	1	1468530	1.499489089
2_22161	1	1475557	0.86106606
2_22160	1	1476294	0.835795901
2_24572	1	1480576	1.104632711
2_24571	1	1481490	1.68172792
2_22800	1	1582260	1.225921199
2_29893	1	1614646	0.76500212
2_44582	1	1621847	0.122640174
2_25371	1	1715942	0.068669283
2_50800	1	1727075	0.317052086
2_47839	1	1747564	0.160490529
2_47482	1	1749762	0.123574302
2_12482	1	1756131	0.317052086
2_12483	1	1756449	0.317052086
2_08410	1	1762579	0.123574302
2_08411	1	1763448	0.123574302
2_11729	1	1791757	0.123574302
2_31931	1	1804469	0.263499917
2_23922	1	1805881	0.352392116
2_34739	1	1806181	0.142046665
2_23921	1	1806241	0.142046665
2_54985	1	1813585	0.352392116
2_09674	1	1818411	0.352392116
2_49742	1	1822853	0.242141072
2_49504	1	1830298	0.26944381
2_09917	1	1851781	0.548121498
2_09916	1	1852254	0.623952548
2_29496	1	1867588	0.349245782
2_29497	1	1867940	0.082027363
2_29498	1	1870761	0.340102807
2_34305	1	1871120	0.082027363
2_31541	1	1874187	0.793093207
2_21761	1	1874991	0.097458656
2_22864	1	1879274	0.082027363
1_0854	1	1879586	0.253225729
2_22865	1	1881091	0.097458656
2_22260	1	1888560	1.188357979
2_22259	1	1889721	1.188357979
2_40188	1	1893390	0.250596101
2_33815	1	1925618	0.082027363
2_38281	1	1942547	0.151539919
2_38280	1	1951113	0.151422963
2_54808	1	1962958	0.036032827
2_47993	1	1981902	0.654469442
2_38028	1	2025731	0.428628955
2_49900	1	2056510	0.206971346
2_54438	1	2068887	0.206971346
2_38970	1	2069389	0.206971346
2_30065	1	2079089	0.548812475
2_30066	1	2079603	0.206971346
2_30067	1	2080872	0.502117058
2_30068	1	2081289	0.120365173
2_17128	1	2096978	0.059005656
2_26503	1	2098224	0.120365173
2_26502	1	2101369	0.059005656
2_26501	1	2101967	0.178283455
2_26505	1	2103665	0.120365173
2_26504	1	2104074	0.059005656
2_04780	1	2104872	0.059005656
1_1034	1	2107419	0.041278481
2_04782	1	2107476	0.164988346
2_04781	1	2108039	0.067490722
2_08775	1	2117604	0.390320234
2_08776	1	2118101	0.390320234
2_05338	1	2149809	0.366147919
2_14990	1	2156737	0.387555237
2_14992	1	2157815	0.366147919
1_0456	1	2174633	0.136564119
2_35214	1	2182401	0.005854487
2_52827	1	2184172	0.642236619
2_40451	1	2206327	0.516469757
2_28208	1	2216053	0.277703445
2_25960	1	2229068	0.350791748
2_03494	1	2230319	0.036750654
2_46746	1	2246158	0.224142078
2_22852	1	2255658	0.038640613
1_0973	1	2265659	0.034826531
2_15409	1	2265723	0.08298315
2_14662	1	2272983	0.509999358
2_14663	1	2274055	0.509872895
2_09914	1	2306825	0.083277661
2_39428	1	2323334	0.409827168
2_08231	1	2324194	0.409827168
1_0803	1	2324484	0.409827168
2_08230	1	2324505	0.409827168
2_13005	1	2352321	1.405055263
2_13006	1	2352963	1.405055263
2_09059	1	2356516	0.884689105
2_09060	1	2356889	0.752223069
2_38501	1	2402702	0.996841166
2_38500	1	2405960	0.996841166
2_49840	1	2407155	0.996841166
2_44567	1	2409531	1.565590792
2_37796	1	2431270	1.875495775
2_08212	1	2453868	0.994733667
2_32083	1	2454065	0.441759568
2_07793	1	2484606	1.552686891
2_07794	1	2484985	1.450016389
2_54024	1	2492609	2.116338565
2_21243	1	2494668	1.450016389
2_21242	1	2495333	1.450016389
2_29605	1	2542990	0.612147647
2_29606	1	2543368	1.044745317
2_13991	1	2545111	1.044745317
2_04232	1	2549275	0.612147647
2_04233	1	2553608	0.263006256
2_19683	1	2573295	0.612147647
2_23211	1	2577892	0.534602276
2_23210	1	2579688	1.026318081
2_28811	1	2585455	0.494673625
2_28812	1	2585914	0.4430345
2_01275	1	2589737	0.4430345
2_01276	1	2590020	0.4430345
2_53093	1	2590208	0.628969101
2_14637	1	2593191	0.4430345
2_14636	1	2593580	0.4430345
2_01724	1	2621551	0.839771643
2_01725	1	2623357	0.871536109
2_01723	1	2626900	0.465643854
2_25201	1	2627168	0.39460875
2_50535	1	2632675	0.49063616
2_25199	1	2633266	0.518414064
2_25200	1	2633747	0.620984713
2_10725	1	2654734	0.465643854
2_28605	1	2655048	0.620984713
2_38595	1	2692575	0.426849796
2_38594	1	2693416	0.426849796
2_30402	1	2705447	0.426849796
2_17017	1	2706185	0.465643854
2_29771	1	2709964	0.49063616
2_29770	1	2710556	0.758329026
2_19300	1	2721146	0.49063616
2_19299	1	2721508	0.49063616
2_22371	1	2743996	0.627327293
2_22372	1	2744590	0.757657379
2_29638	1	2745293	0.229523558
2_14067	1	2745694	1.025764723
2_23270	1	2758346	0.343279085
2_23269	1	2758718	0.465643854
2_41598	1	2763567	0.465643854
2_38919	1	2781974	0.465643854
2_38920	1	2783840	0.456925765
2_42833	1	2792523	0.343279085
2_43947	1	2799669	0.317088137
2_21657	1	2803852	0.465643854
2_21656	1	2804366	0.465643854
2_46207	1	2848184	0.37647161
2_10738	1	2868156	0.911474108
2_10739	1	2869923	0.911474108
2_48769	1	2873856	0.497409026
2_45668	1	2913723	0.587119642
2_15025	1	2928734	0.031974936
2_15024	1	2929178	0.933226963
2_29713	1	2930476	0.588447632
2_14260	1	2931661	0.956284142
2_29712	1	2932518	0.664461868
2_14259	1	2932866	0.588447632
2_49291	1	2946677	0.037299268
2_25175	1	2949132	0.932259797
2_40856	1	2950267	1.087618501
2_33373	1	2952292	0.911474108
2_54619	1	2986922	1.006519681
2_35333	1	2996856	0.027144821
2_10195	1	2997161	0.872992443
1_0397	1	2998855	0.664461868
2_48294	1	2998855	0.664461868
2_53014	1	3014658	0.664461868
2_00854	1	3017780	0.664461868
2_00853	1	3018461	0.664461868
2_14633	1	3022892	1.105462415
2_14632	1	3023225	0.18438905
2_47368	1	3032331	0.681143966
2_20802	1	3035563	0.465643854
2_20801	1	3035942	0.465643854
2_09654	1	3055311	0.664461868
2_53295	1	3118139	0.906998803
2_52976	1	3125676	0.735654493
2_44347	1	3129352	0.772576104
2_23706	1	3131281	0.712735874
2_23707	1	3132251	0.735654493
2_06640	1	3144735	0.487489036
2_27189	1	3145370	0.735654493
2_40758	1	3163128	0.588279307
2_01267	1	3163999	0.734804694
2_51110	1	3172507	0.407845458
2_50498	1	3204214	0.781674603
2_11202	1	3208100	0.843814427
2_11205	1	3216840	0.798029658
2_11204	1	3218978	0.781674603
2_11203	1	3220141	0.781674603
2_54271	1	3237407	0.521015283
2_16819	1	3240775	0.521015283
2_16818	1	3241852	0.521015283
2_51841	1	3251239	0.203724087
2_07796	1	3251657	0.773090915
2_27626	1	3252408	0.67910629
2_49211	1	3264879	0.490165991
1_0969	1	3275795	0.51792717
2_23851	1	3276001	0.251362401
2_23850	1	3279115	0.125866221
2_49167	1	3290491	0.509269192
2_30699	1	3295472	0.51792717
2_55488	1	3297212	0.718807496
2_33374	1	3305548	0.741147299
2_19569	1	3305974	1.26954074
2_05551	1	3318577	0.51792717
2_05550	1	3319034	0.51792717
1_0314	1	3319422	0.82087927
2_02576	1	3350467	0.466634727
2_02578	1	3355071	0.064916151
2_02577	1	3355870	0.199042477
2_14328	1	3396288	0.731234873
2_14329	1	3396929	0.6648431
2_46701	1	3464791	0.407379179
2_03799	1	3465435	0.839441438
2_10365	1	3499484	0.671009145
2_10366	1	3499934	0.671009145
1_0321	1	3513467	0.671009145
2_30985	1	3513467	0.671009145
2_30986	1	3514155	0.679479841
2_00218	1	3526570	0.826347625
2_24533	1	3527405	0.615628662
2_40201	1	3534583	0.826347625
2_53647	1	3548419	0.860404242
2_41024	1	3550075	1.023054249
2_10396	1	3555791	0.917430036
2_10395	1	3556120	0.987289287
2_38421	1	3607836	0.01978749
2_21017	1	3642059	0.872927613
2_21016	1	3642673	0.580011227
2_53074	1	3648359	0.698254009
2_32648	1	3665671	0.374780181
2_05278	1	3666126	0.340549705
2_10969	1	3672004	0.186092246
2_10970	1	3672287	0.579202899
2_18767	1	3677625	0.439208938
2_49074	1	3694503	1.171404544
2_38585	1	3708088	0.455299587
2_38586	1	3709315	0.656118962
2_18875	1	3713506	0.11970673
2_32211	1	3713665	0.656118962
2_12302	1	3724152	0.656118962
2_12303	1	3726284	0.455299587
2_50341	1	3732158	0.662840355
2_07252	1	3764988	0.656118962
2_07253	1	3765336	0.656118962
2_09081	1	3778281	0.483491068
2_09080	1	3779931	0.656118962
2_43296	1	3789223	1.413525221
2_53545	1	3792584	0.623733364
2_46469	1	3817270	0.455299587
2_50771	1	3848223	0.381836804
2_08036	1	3849372	0.558226337
2_11378	1	3858158	0.656118962
2_11379	1	3862987	0.49898184
2_48513	1	3868412	0.656118962
2_39085	1	3879260	0.946000139
2_19288	1	3888584	0.37315684
2_19287	1	3888852	0.45578308
2_25939	1	3898373	0.251377896
2_25938	1	3899232	0.738118851
2_14287	1	3901186	0.531711761
2_14286	1	3901706	0.738118851
2_04267	1	3920703	0.222631184
2_30760	1	3928159	0.089941507
2_18817	1	3928433	0.825387858
2_49943	1	3940226	1.878440156
2_23742	1	3945116	1.338376591
2_09278	1	3949694	0.615341988
2_09277	1	3950053	0.271297299
2_48442	1	3952386	1.839531469
2_44219	1	3964479	1.254066842
2_12168	1	3970294	0.812197361
2_00103	1	3985815	1.108239599
2_00104	1	3990629	1.283913146
2_45726	1	3994685	1.36181036
2_00904	1	4029325	0.168392545
1_0976	1	4029644	0.882596116
2_03583	1	4030904	0.882596116
2_55030	1	4045329	0.222631184
2_48591	1	4050274	0.882596116
2_03167	1	4059276	0.882596116
2_16948	1	4070484	0.505511462
2_49267	1	4108180	1.024982002
2_45826	1	4415860	0.87889997
2_25593	1	4453090	1.469288162
2_25594	1	4453420	1.3357342
2_04259	1	4461838	1.3357342
2_29314	1	4474660	1.441411417
2_20957	1	4486784	1.126214539
2_07632	1	4496790	1.558461961
1_0673	1	4497139	2.039053804
2_07633	1	4497139	2.132532512
2_07630	1	4498668	1.424119684
1_0672	1	4498886	1.486649201
2_07631	1	4499067	0.972324284
2_00713	1	4506642	1.027056992
2_24737	1	4507702	0.638536598
2_07128	1	4527856	1.02346662
2_07129	1	4528100	0.638536598
2_11834	1	4530529	0.702611588
2_28962	1	4531159	0.42948041
2_06644	1	4572422	0.199008139
2_35134	1	4572464	0.082583774
2_23424	1	4589181	0.199008139
2_23423	1	4590570	0.502296504
2_34154	1	4597139	1.394264106
2_10316	1	4597749	0.199008139
2_40491	1	4600001	0.254363177
2_11053	1	4607157	0.200177169
2_18399	1	4617471	0.069025513
2_28620	1	4617865	0.069025513
2_10769	1	4618155	0.017547849
2_27243	1	4623083	0.199008139
2_27242	1	4623786	0.199008139
2_09463	1	4630735	0.162594661
2_09464	1	4631409	0.129824423
2_38363	1	4637146	0.129824423
2_55582	1	4655483	0.030686616
1_0311	1	4675961	0.262982383
2_01260	1	4675961	0.262982383
2_01261	1	4676337	0.029007277
2_00798	1	4685925	0.262982383
2_00797	1	4689610	0.328262664
2_51823	1	4694480	0.696350439
2_04559	1	4696256	0.029007277
2_04560	1	4696667	0.029007277
2_21565	1	4698861	0.117600703
2_21566	1	4699108	0.029007277
2_51226	1	4701570	0.128830024
2_16743	1	4707752	0.262982383
2_16744	1	4708627	0.174165098
2_40513	1	4731762	0.219466675
2_48570	1	4735336	0.239050049
2_02239	1	4753216	0.046138872
2_02240	1	4755381	0.046138872
2_48225	1	4778823	0.192579987
2_49907	1	4784092	0.166974074
2_45656	1	4794847	0.418255085
2_44751	1	4799045	0.033393703
2_26693	1	4837891	0.320599361
2_05267	1	4841797	0.039919454
2_23673	1	4863704	0.166974074
2_23672	1	4865610	0.315873074
2_21794	1	4872893	0.039343747
2_51336	1	4876107	0.33321067
2_04528	1	4891140	0.166974074
2_36106	1	4906027	0.719535453
2_48350	1	4925980	0.418972447
2_37356	1	4927247	0.119495095
2_34658	1	4927455	0.022253538
2_21554	1	4927606	0.686259292
2_21553	1	4928202	0.407046428
2_49889	1	4943760	0.837047471
2_54696	1	4952116	0.722849386
2_36413	1	4954134	0.610320157
2_40706	1	4994639	0.880942162
2_36534	1	5001533	0.533606954
2_48020	1	5015213	0.481038836
2_42599	1	5021522	0.481038836
2_55386	1	5045847	0.143464441
2_46946	1	5171669	1.064240896
2_40422	1	5196594	0.538351432
2_24425	1	5255398	1.146362618
2_52355	1	5276627	1.064240896
2_52902	1	5283791	1.031657169
2_09615	1	5295828	0.580011227
2_48303	1	5376366	0.347376596
2_38892	1	5451058	0.129959134
2_38893	1	5453084	0.384565519
2_13884	1	5486580	0.231139999
2_44933	1	5523311	0.810846697
2_28652	1	5534993	0.530988441
2_55203	1	5535754	0.426977466
2_10321	1	5562380	0.563566997
2_28452	1	5566605	0.122962855
2_36024	1	5580856	0.726813468
2_33103	1	5620543	0.587505853
2_14051	1	5722311	0.188921231
2_34319	1	5723241	0.807237465
2_12278	1	5726365	0.09975307
2_34536	1	5745494	0.188921231
2_30839	1	5745702	0.09975307
1_0190	1	5749997	0.105866778
2_36603	1	5750927	0.188921231
2_52204	1	5753942	0.09975307
2_52249	1	5755090	0.188921231
2_30075	1	5842466	0.182071218
2_39949	1	5856714	0.042819077
2_34911	1	5875788	0.259803164
2_36480	1	5876507	0.259803164
2_50857	1	6067828	0.698492543
2_38376	1	6132729	0.303241834
2_43999	1	6200141	0.326076404
2_33689	1	6207578	1.03193754
2_51732	1	6238582	0.376864468
2_39648	1	6280652	0.11947794
2_06024	1	6304685	0.090556303
2_38632	1	6313287	0.057208442
2_17813	1	6357776	0.362430224
2_40159	1	6444930	0.004535925
2_39879	1	6448808	0.005361755
2_40354	1	6455712	0.1786175
2_46129	1	6484966	0.510758909
2_38354	1	6502066	0.509156967
2_38353	1	6503961	0.011418749
2_41657	1	6510356	0.11922641
2_43020	1	6513748	0.046859099
2_37378	1	6577186	0.509156967
2_52185	1	6627331	0.252230959
2_03520	1	6647764	0.040872712
2_00894	1	6688361	0.325230686
2_43100	1	6716282	0.007062282
2_43136	1	6774488	0.979348732
2_40227	1	6825817	0.258966646
2_31356	1	6840457	0.661304511
2_31357	1	6841204	0.698731208
2_54515	1	6842784	0.698731208
2_33679	1	6850712	0.237794242
2_24875	1	6850936	0.288361462
2_30976	1	6860490	0.658703997
2_19605	1	6860829	0.342332357
2_53714	1	6863991	0.681143966
2_19105	1	6872475	0.658703997
2_54057	1	6877389	0.445062845
2_34714	1	6882915	0.44974718
2_23135	1	6884214	0.100354563
2_33580	1	6884422	0.100354563
2_23136	1	6884482	0.410989221
2_31335	1	6921162	0.000899921
2_20855	1	6922178	0.000899921
2_40174	1	6943636	0.102499367
2_34360	1	6954020	0.280031001
2_54650	1	6974083	0.035137209
2_46743	1	6977507	0.587791534
2_08882	1	6979161	0.587791534
2_43011	1	6990939	0.590033081
2_41803	1	7001541	0.590033081
2_05850	1	7013385	1.219394694
2_44813	1	7025288	0.05859293
2_49442	1	7038384	0.320890218
2_07745	1	7042031	0.258108131
2_07746	1	7045039	0.258108131
2_32979	1	7049265	0.833954912
2_13021	1	7049438	1.152550738
2_53351	1	7071844	0.035537652
2_21367	1	7082317	1.01596802
2_17664	1	7086782	0.18090375
2_44470	1	7100672	0.337431033
2_23255	1	7108612	0.252137816
2_23256	1	7111283	0.20366161
2_51198	1	7140117	0.715298621
2_19706	1	7140898	0.114017189
2_18115	1	7147505	0.865631615
2_39650	1	7186455	0.670114195
2_44596	1	7191022	0.446711806
2_08584	1	7200361	0.527858139
2_37297	1	7208188	0.038764055
2_52037	1	7213715	0.717060834
2_55559	1	7274098	0.717060834
2_46242	1	7320963	0.13467686
2_50338	1	7325380	0.13467686
2_46299	1	7328715	0.651052934
2_52115	1	7374833	0.415714017
2_06643	1	7381488	0.415714017
2_32067	1	7381661	0.651052934
2_47439	1	7397262	0.56507997
2_42731	1	7403147	0.008207053
2_37936	1	7418287	0.651052934
2_37937	1	7427573	0.651052934
2_40251	1	7441945	0.651052934
2_39896	1	7454532	0.651052934
2_54805	1	7478567	0.032002986
2_44400	1	7481968	0.193426625
2_55506	1	7498222	1.684449466
2_17992	1	7559244	0.143011456
2_50075	1	7567738	0.471134699
2_05843	1	7568383	0.491079928
2_39645	1	7571377	0.471134699
2_44243	1	7577113	0.471134699
2_44379	1	7613653	0.471134699
2_40745	1	7632957	0.038764055
2_13984	1	7634128	0.471134699
2_13985	1	7634397	0.038764055
2_29331	1	7637594	0.471134699
2_29332	1	7637921	0.038764055
2_41714	1	7652147	0.43666133
2_27936	1	7658664	0.471134699
2_27935	1	7659304	0.043903638
2_04628	1	7667924	0.471134699
2_50593	1	7713010	0.568507575
2_04748	1	7721555	0.055275572
2_33875	1	7728537	0.453815283
2_04750	1	7728907	0.096221117
2_46878	1	7753012	0.097436915
2_19374	1	7758882	0.052169418
2_20701	1	7778465	0.453815283
2_42472	1	7787913	0.453815283
2_28600	1	7801618	0.12088691
2_44820	1	7893983	0.000351921
2_03787	1	7904920	0.42725615
2_52364	1	7915891	0.491685798
2_42921	1	7919713	0.491685798
2_44455	1	7925658	0.519849275
2_50669	1	7927798	0.002338446
2_40383	1	7927844	0.566694301
2_50501	1	7953254	0.002338446
2_45042	1	7979536	0.511435183
2_41966	1	7989492	0.519849275
2_39922	1	7996362	1.453087357
2_53590	1	8005356	0.022893989
2_44777	1	8031201	0.324881848
2_21097	1	8037014	0.002338446
2_48576	1	8052999	0.519849275
2_51286	1	8127507	0.521130614
2_41616	1	8147393	0.17582859
2_44303	1	8148392	0.00581047
2_45185	1	8179719	0.508456221
2_45404	1	8183377	0.00581047
2_41327	1	8244708	0.155311631
2_53723	1	8246046	0.136694988
2_11573	1	8265497	0.519849275
2_41744	1	8282139	0.519849275
2_41428	1	8289642	0.002338446
2_52889	1	8319240	0.563805538
2_53542	1	8328055	0.002338446
2_52656	1	8331330	0.000312805
2_52380	1	8343307	0.491685798
2_37994	1	8359649	0.519849275
2_37993	1	8364084	0.002338446
2_31644	1	8381748	0.002338446
2_11239	1	8384493	0.341530688
2_11240	1	8384868	0.002338446
2_47119	1	8385801	0.002338446
2_51280	1	8386602	0.00350584
2_39584	1	8394090	0.002338446
2_33847	1	8396081	0.453815283
2_33846	1	8396822	0.519849275
2_40364	1	8414776	0.519849275
2_44999	1	8435371	0.002338446
2_45256	1	8439586	0.519432575
2_39149	1	8441588	0.39960437
2_39298	1	8446815	0.002338446
2_48168	1	8454897	0.519849275
2_52504	1	8462457	1.097453221
2_44895	1	8469772	0.002338446
2_42561	1	8477955	0.002338446
2_39232	1	8480981	0.013447707
2_34318	1	8490411	0.022089003
2_29619	1	8490458	0.002338446
2_44912	1	8506101	0.519849275
2_45091	1	8542346	0.519849275
2_52178	1	8572508	0.519849275
2_30200	1	8577159	0.020670193
2_13902	1	8595924	0.519849275
2_39139	1	8608225	0.519849275
2_40426	1	8618022	0.070458467
2_48996	1	8675276	0.519849275
2_41629	1	8695047	0.070458467
2_05521	1	8707617	0.002338446
2_05522	1	8707975	0.002338446
2_43101	1	8713626	0.519849275
2_37549	1	8721804	0.315199506
2_43220	1	8748525	0.519849275
2_53674	1	8755036	0.002338446
2_43086	1	8770794	0.002338446
2_38165	1	8776686	0.070458467
2_49471	1	8806752	0.012271187
2_33566	1	8830745	0.070458467
2_22698	1	8832334	0.002338446
2_49503	1	8834481	0.519849275
2_30396	1	8840084	0.519849275
2_52451	1	8841407	0.519849275
2_11206	1	8860672	0.070458467
2_28778	1	8861827	0.109495149
2_40138	1	8876898	0.491685798
2_39077	1	8922190	0.435097327
2_42677	1	8945705	0.249862032
2_48672	1	8950217	0.575069386
2_48526	1	8951966	0.491685798
2_52075	1	9017157	0.002338446
2_47308	1	9027518	0.519849275
2_47301	1	9038638	0.070458467
2_13947	1	9048729	0.254448995
2_44823	1	9086473	0.187942713
2_39906	1	9102583	0.394867413
2_48642	1	9123333	0.002338446
2_45385	1	9129310	1.115601174
2_48361	1	9135861	0.176564898
2_48397	1	9148738	0.176564898
2_47460	1	9152465	0.12088691
2_42696	1	9164694	0.12088691
2_43414	1	9168817	0.00516394
2_52932	1	9171274	0.002338446
2_44848	1	9201672	0.002674788
2_54546	1	9203562	0.002338446
2_43298	1	9208449	0.341530688
2_43536	1	9231049	0.45726169
2_44783	1	9237766	0.470749355
2_52765	1	9248784	0.002338446
2_42098	1	9251812	0.176564898
2_50869	1	9270776	0.106887669
2_49221	1	9287997	0.12088691
2_45165	1	9292650	0.176564898
2_53174	1	9303780	0.335160663
2_43826	1	9304736	0.119003585
2_48414	1	9310891	0.055487718
2_37655	1	9315883	0.020351485
2_37656	1	9318320	0.08739538
2_48979	1	9334833	0.124828729
2_46533	1	9341540	0.002338446
2_02364	1	9354079	0.176564898
2_02365	1	9356852	0.235629562
2_51845	1	9361353	0.002338446
2_39728	1	9369370	0.350441235
2_45594	1	9375532	0.350441235
2_48815	1	9390060	0.12088691
2_43383	1	9392212	0.022418135
2_41788	1	9426403	0.002338446
2_43500	1	9445119	0.002338446
2_31764	1	9447422	0.12088691
2_31765	1	9449814	0.12088691
2_42013	1	9455387	0.519849275
2_52555	1	9458632	0.264888358
2_49456	1	9466116	0.12088691
2_38415	1	9499522	0.12088691
2_38414	1	9505530	0.002338446
2_48342	1	9515642	0.002338446
2_43299	1	9518508	0.315199506
2_38979	1	9529429	0.341530688
2_47608	1	9545003	0.176564898
2_37938	1	9553245	0.394867413
2_51555	1	9582041	0.176564898
2_50951	1	9609702	0.004601758
2_51536	1	9612524	0.12088691
2_48645	1	9624390	0.304781081
2_55184	1	9629965	0.12088691
2_41429	1	9630918	0.394867413
2_43460	1	9650685	0.002338446
2_54738	1	9685899	0.012056804
2_54879	1	9696462	0.116525948
2_53521	1	9713360	0.270778496
2_48165	1	9718982	0.315199506
2_53287	1	9726680	0.304781081
2_02985	1	9743944	0.394867413
2_49753	1	9751325	0.30279682
2_49463	1	9779018	0.683212188
2_43539	1	9793961	1.022184974
2_32460	1	9805802	0.304781081
2_40604	1	9847254	0.359498687
2_47433	1	9893352	0.125292107
2_42857	1	9896444	0.297724596
2_45650	1	9897993	0.320236064
2_38325	1	9935209	0.394867413
2_25882	1	9948670	0.053135253
2_03344	1	9952319	0.394867413
2_47277	1	9970173	0.220894351
2_43803	1	9976215	0.002338446
2_24407	1	9984626	0.12088691
2_03180	1	9984769	0.022089003
2_42157	1	10032271	0.348440949
2_41709	1	10035349	0.00201109
2_53278	1	10060402	0.453815283
2_54987	1	10093895	0.185286387
2_39524	1	10155264	0.00561685
2_24789	1	10171084	0.453815283
2_00841	1	10172727	0.12088691
2_29642	1	10220605	0.109495149
2_29641	1	10221439	0.315199506
2_53589	1	10235637	0.348440949
2_07469	1	10237303	0.002338446
2_07468	1	10237722	0.341530688
2_03706	1	10242938	0.533384433
2_03707	1	10245278	0.68797082
2_46042	1	10279833	0.002338446
2_09206	1	10280483	0.453815283
2_28076	1	10281083	0.002338446
2_06726	1	10286052	0.348440949
2_27475	1	10287808	0.002338446
2_07463	1	10290630	0.109495149
2_09557	1	10299079	0.002338446
2_09558	1	10299614	0.519849275
2_52317	1	10305635	0.109495149
2_44137	1	10316187	0.519849275
2_42392	1	10322552	0.519849275
2_48030	1	10340327	0.002338446
2_39507	1	10351621	0.109495149
2_51217	1	10355462	0.519849275
2_51097	1	10357573	0.519849275
2_39818	1	10371876	0.109495149
2_13937	1	10372752	0.002338446
2_55341	1	10374235	0.002338446
2_53953	1	10383854	0.485837572
2_50637	1	10387716	0.519849275
2_43874	1	10389806	0.519849275
2_51983	1	10398924	0.294974909
2_46444	1	10399889	0.05037583
2_39768	1	10406957	0.12088691
2_39998	1	10427002	0.238718825
2_29571	1	10438745	0.37804518
2_51189	1	10441887	0.315199506
2_53567	1	10445576	0.341530688
2_48841	1	10490956	0.341530688
2_53584	1	10505043	0.341530688
2_46454	1	10507024	0.463719393
2_44183	1	10533642	0.341530688
2_31154	1	10539475	0.002338446
2_44059	1	10568401	0.341530688
2_47582	1	10576165	0.165153477
2_47855	1	10579126	0.475175637
2_42939	1	10587797	0.002338446
2_30054	1	10591084	0.519849275
2_41036	1	10623314	0.313515671
2_46367	1	10630186	0.313515671
2_45293	1	10632464	0.002338446
2_38814	1	10635534	0.798930769
2_38813	1	10637896	0.519849275
2_38834	1	10666370	0.341530688
2_10692	1	10773528	0.341530688
2_28588	1	10774180	0.002338446
2_37939	1	10795047	0.12088691
2_42773	1	10797569	0.315199506
2_46117	1	10803800	1.035127791
2_39430	1	10814660	0.315199506
2_16393	1	10823647	0.341530688
2_16394	1	10824422	0.002338446
2_50676	1	10830679	0.341530688
2_07399	1	10842675	0.002338446
2_07398	1	10843198	0.513796292
2_40907	1	10855215	0.026650436
2_42456	1	10875563	0.053955692
2_23374	1	10889013	0.453815283
2_23375	1	10889870	0.097436915
2_44818	1	10946261	0.003737944
2_47337	1	10947530	0.097436915
2_19124	1	10957968	0.453815283
2_19125	1	10958278	0.097436915
2_51355	1	10972428	0.854554964
2_25108	1	10986562	0.39960437
2_51977	1	10995961	0.173406946
2_52309	1	10998345	0.171153281
2_32823	1	11006581	0.12088691
2_28339	1	11011794	0.12088691
2_10013	1	11012672	0.12088691
2_10012	1	11013653	0.005854487
2_41644	1	11024022	0.002338446
2_05209	1	11038697	0.315199506
2_05208	1	11039697	0.109495149
2_47060	1	11098645	0.002338446
2_40025	1	11135100	0.05037583
2_52840	1	11167321	0.117065836
2_52698	1	11176591	0.12088691
2_43341	1	11183168	0.353851239
2_05660	1	11189938	0.002338446
2_05659	1	11191754	0.002338446
2_42446	1	11214057	0.002338446
2_03439	1	11228790	0.519849275
2_03438	1	11229705	0.021988484
2_01466	1	11269826	0.341530688
2_01467	1	11270219	0.341530688
2_08502	1	11309984	0.341530688
2_08501	1	11310635	0.341530688
2_54471	1	11335818	0.209707797
2_37777	1	11343102	0.12088691
2_24820	1	11346273	0.052228189
2_43230	1	11360509	0.002338446
2_40552	1	11371710	0.4529641
2_28197	1	11378442	0.315199506
2_32807	1	11378640	0.39960437
2_09549	1	11379405	0.424973891
2_44856	1	11395297	0.173329262
2_53491	1	11398974	0.124388978
2_47516	1	11400725	0.007773541
2_09276	1	11434796	0.491685798
2_24471	1	11436174	0.315199506
2_43900	1	11481440	0.109495149
2_45865	1	11493588	0.39960437
2_48355	1	11512114	0.041283257
2_27101	1	11520764	0.002338446
2_50591	1	11523376	0.109495149
2_46048	1	11552570	0.490300273
2_39091	1	11592385	0.125344267
2_41075	1	11609628	0.002338446
2_55483	1	11615423	0.39960437
2_47545	1	11618601	0.087076834
2_47292	1	11626864	0.519849275
2_48327	1	11644205	0.082205757
2_46263	1	11655599	0.540170422
2_53163	1	11661036	0.341530688
2_54984	1	11693913	0.519849275
2_38797	1	11706102	0.087252006
2_38798	1	11715953	0.519849275
2_17844	1	11721291	0.519849275
2_17843	1	11722279	0.002338446
2_54978	1	11731158	0.519849275
2_54300	1	11739630	0.519849275
2_45177	1	11745692	0.533859282
2_30714	1	11752743	0.002338446
2_48478	1	11772744	0.137958114
2_42192	1	11777906	0.097436915
2_39120	1	11797067	0.002338446
2_55180	1	11800364	0.118438466
2_26415	1	11925966	0.519849275
2_47155	1	11929540	0.579565635
2_54593	1	12032440	0.232821863
2_42018	1	12039424	0.08464766
2_43074	1	12043779	0.779682664
2_38978	1	12064552	0.000664979
2_14268	1	12113399	0.276339133
2_14267	1	12114140	0.276339133
2_44817	1	12130373	0.197732677
2_45297	1	12147069	0.229000795
2_54573	1	12148535	0.20063877
2_43145	1	12154668	0.089936165
2_39666	1	12166976	0.058955909
2_02994	1	12202958	0.103953535
2_02995	1	12204623	0.16573193
2_40459	1	12217120	0.16573193
2_53043	1	12228956	0.16573193
2_17283	1	12244858	0.164493329
2_44920	1	12249451	0.16573193
2_44952	1	12253958	0.103953535
2_45605	1	12267641	0.103953535
2_47016	1	12280069	0.089936165
2_47400	1	12281229	0.089936165
2_48423	1	12283603	0.16573193
2_44378	1	12332009	0.16573193
2_17396	1	12338298	0.16573193
2_30471	1	12339519	0.16573193
2_43059	1	12386256	0.103953535
2_26424	1	12393354	0.103953535
2_23231	1	12397914	0.229000795
2_23232	1	12398370	0.103953535
2_40949	1	12404298	0.103953535
2_45001	1	12413320	0.16573193
2_14121	1	12445325	0.038156683
2_14120	1	12446034	0.391313542
2_43107	1	12449166	0.038156683
2_41701	1	12465212	0.391313542
2_32630	1	12475175	0.32436828
2_04855	1	12476356	0.038156683
2_32631	1	12477502	0.391313542
2_43454	1	12492482	0.391313542
2_38260	1	12497977	0.391313542
2_26901	1	12504872	0.391313542
2_33933	1	12505454	0.244864836
2_40380	1	12511505	0.391313542
2_49662	1	12551862	0.064200616
2_17558	1	12556340	0.064200616
2_17557	1	12557191	0.064200616
2_38957	1	12574139	0.064200616
2_41168	1	12575730	0.347647275
2_43469	1	12587822	0.064200616
2_51595	1	12598915	0.207846537
2_26089	1	12611316	0.207846537
2_26088	1	12611720	0.207846537
2_09598	1	12617991	0.064200616
2_44454	1	12627237	0.347647275
2_09597	1	12627974	0.12088691
2_53263	1	12639167	0.207846537
2_52871	1	12647884	0.568491495
2_49626	1	12659995	0.194302089
2_55332	1	12662068	0.064200616
2_52539	1	12663261	0.064200616
2_24016	1	12666932	0.207846537
2_31943	1	12667631	0.064200616
2_04160	1	12679087	0.234405945
2_47092	1	12720315	1.041197297
2_46027	1	12733786	0.586230982
2_49634	1	12745195	0.676397305
2_21288	1	12772429	0.452742327
2_23449	1	12778934	0.452742327
2_38769	1	12857259	0.12088691
2_02759	1	12886611	0.12088691
2_00170	1	12901001	0.12088691
2_24511	1	12902854	0.12088691
2_39919	1	12924901	0.112236459
2_44242	1	12942967	0.275486563
2_46699	1	12945246	0.12088691
2_46137	1	12958435	0.291298726
2_27024	1	12972095	0.112236459
2_29819	1	13020367	0.12088691
2_14672	1	13020873	0.01153023
2_50761	1	13023437	0.233549972
2_54229	1	13026281	0.28784716
2_44096	1	13057619	0.151884812
2_55052	1	13061850	0.151884812
2_46920	1	13068266	0.361321093
2_40528	1	13137985	0.359240386
2_45708	1	13144449	0.12088691
2_41935	1	13155280	0.359240386
2_47137	1	13167560	0.109031568
2_44501	1	13172912	0.359240386
2_48500	1	13195168	0.359240386
2_40148	1	13250668	0.359240386
2_44241	1	13270120	0.19299294
2_39925	1	13284778	0.359240386
2_29987	1	13340704	0.359240386
2_44271	1	13378454	0.151854007
2_43430	1	13402121	0.120267775
2_45802	1	13418601	0.359240386
2_32932	1	13447375	0.12088691
2_12205	1	13447901	0.154374922
2_41679	1	13505065	0.12088691
2_40108	1	13512140	0.12088691
2_00830	1	13516834	0.12088691
2_00829	1	13518660	0.154374922
2_43045	1	13522563	0.344112765
2_39864	1	13543548	0.359240386
2_53190	1	13572470	0.154374922
2_39201	1	13605373	1.070376748
2_34709	1	13656415	0.359240386
2_31787	1	13656606	0.12088691
2_43576	1	13664536	0.359240386
2_40500	1	13688478	0.150562158
2_42993	1	13690484	0.515159409
2_51300	1	13716599	0.119003585
2_40046	1	13718313	0.154374922
2_40895	1	13729784	0.359240386
2_43482	1	13732582	0.359240386
2_39314	1	13741158	0.147922769
2_39177	1	13759239	0.359240386
2_55287	1	13775666	0.105772578
2_52736	1	13785378	0.359240386
2_31574	1	13807473	0.359240386
2_25265	1	13810315	0.359240386
2_33737	1	13810839	0.12088691
2_25266	1	13811108	0.12088691
2_33465	1	13812864	0.154374922
2_01856	1	13814393	0.119003585
2_49416	1	13830782	0.159755857
2_46109	1	14177760	0.123759059
2_41719	1	14570848	0.180765445
2_46660	1	14594544	0.123759059
2_41729	1	14619649	0.105772578
2_49118	1	14628548	0.123759059
2_43013	1	14656728	0.294855007
2_48693	1	16127141	0.123759059
2_38383	1	16609836	0.359240386
2_38384	1	16613696	0.12088691
2_00597	1	16621701	0.12088691
2_39710	1	16727073	0.359240386
2_54937	1	16740101	0.359240386
2_43370	1	16746481	0.359240386
2_24055	1	16751508	0.359240386
2_31951	1	16752629	0.359240386
2_53766	1	16760804	0.070581074
2_39588	1	16762426	0.077139657
2_52231	1	16765742	0.077139657
2_29818	1	16807853	0.28784716
2_34353	1	16811182	0.28784716
2_49092	1	16830430	0.119003585
2_52112	1	16865137	0.119003585
2_44197	1	16868534	0.077139657
2_50138	1	16937148	0.077139657
2_51263	1	16942232	0.359608015
2_28607	1	16953905	0.233549972
2_40866	1	16960383	0.359240386
2_42943	1	16992649	0.28784716
2_51271	1	17000668	0.359240386
2_39225	1	17009708	0.28784716
2_28050	1	17021265	0.12088691
2_28051	1	17023712	0.154523668
2_41542	1	17040166	0.288100019
2_53005	1	17057696	0.105772578
2_38561	1	17063683	0.154374922
2_38560	1	17068485	0.12088691
2_26633	1	17071904	0.359240386
2_05079	1	17073658	0.123759059
2_42870	1	17091266	0.233974026
2_25934	1	17099254	0.233974026
2_38320	1	17101024	1.06945847
2_19000	1	17146405	0.521953237
2_04218	1	17161380	0.521953237
2_06328	1	17169238	0.113509275
2_06329	1	17169651	0.521953237
2_43641	1	17215380	0.14018346
2_42729	1	17291434	0.521953237
2_42289	1	17303142	0.24310537
2_54876	1	17307701	0.201314833
2_14972	1	17322129	0.521953237
2_29910	1	17324767	0.521953237
2_48198	1	17329086	0.233549972
2_15113	1	17342087	0.113509275
2_15567	1	17352489	0.310371533
2_46536	1	17356219	0.034704204
2_30272	1	17361831	0.041015881
2_51031	1	17363300	0.005687247
2_53373	1	17392636	0.492764993
2_39781	1	17443160	0.080095964
2_50774	1	17480564	1.282745687
2_47366	1	17491756	0.080095964
2_45356	1	17527413	0.240573917
2_43734	1	17556343	0.241981827
2_50762	1	17588521	0.240573917
2_43752	1	17638242	0.429305317
2_39461	1	17672708	0.080095964
2_42923	1	17716361	0.080095964
2_38005	1	17761826	0.080095964
2_38006	1	17764162	0.080095964
2_46243	1	17800628	0.080095964
2_53047	1	17801882	0.080095964
2_44362	1	17822713	0.080095964
2_40141	1	17857996	0.08192246
2_34408	1	17860976	0.244742739
2_50755	1	17866520	0.300778178
2_28591	1	17874612	0.080095964
2_05601	1	17921066	0.244742739
2_05602	1	17921940	0.080095964
2_43119	1	17960205	0.080095964
2_39329	1	18000336	0.080095964
2_23306	1	18020224	0.080095964
2_38042	1	18091743	0.466342312
2_49792	1	18096233	0.204286784
2_28622	1	18104659	0.579235863
2_28621	1	18106894	0.579235863
2_42963	1	18109831	0.579235863
2_52695	1	18115594	0.10864098
2_45351	1	18147503	0.071650243
2_28322	1	18166664	0.191734997
2_36838	1	18171305	0.460171442
2_54784	1	18182592	0.219603471
2_02470	1	18186788	0.948963305
2_46503	1	18205114	0.235644506
2_42208	1	18209221	0.619861147
2_42598	1	18244262	0.619861147
2_32997	1	18248441	0.619861147
2_53754	1	18266527	0.222652939
2_49446	1	18294343	0.302482967
2_41287	1	18333209	0.337166645
2_50544	1	18347743	1.168706256
2_51456	1	18359634	0.318894501
2_40903	1	18365112	0.795662924
2_43823	1	18366480	0.19303358
2_53675	1	18395858	0.071220213
2_47552	1	18429129	0.320717498
2_39166	1	18434220	0.648474245
2_47635	1	18451303	0.444651582
2_18543	1	18489546	0.456913328
2_49613	1	18501178	0.123372314
2_43663	1	18518639	0.123372314
2_45163	1	18538618	0.358337538
2_40464	1	18547847	0.356034369
2_36287	1	18593289	0.795662924
2_49506	1	18597350	0.323224111
2_35771	1	18602091	0.583259666
2_27175	1	18605145	0.323224111
2_27173	1	18610264	0.323224111
2_27174	1	18610675	0.144020748
2_36148	1	18628896	0.795662924
2_36147	1	18629635	0.795662924
2_01095	1	18672125	0.323224111
2_24902	1	18672847	0.323224111
2_40588	1	18694500	0.323224111
2_53079	1	18697134	0.323224111
2_26137	1	18722712	0.623295328
2_03947	1	18724537	1.7000571
2_16329	1	18731626	0.30841463
2_16328	1	18733046	0.30841463
2_52553	1	18734686	0.11922641
2_50949	1	18747902	0.30841463
2_41790	1	18756305	0.11922641
2_33766	1	18769608	0.11922641
2_53166	1	18785865	0.30841463
2_51507	1	18790962	0.119729615
2_42403	1	18839884	0.220244825
2_47064	1	18940894	0.156979125
2_51753	1	18956346	0.084911618
2_37941	1	18982477	0.461061994
2_45430	1	19036883	0.340958972
2_45058	1	19061210	0.522531449
2_55482	1	19150300	1.549750892
2_36363	1	19198343	0.073384918
2_36478	1	19270289	0.368160676
2_47294	1	19291693	0.244041341
2_40800	1	19326535	0.076823359
2_49794	1	19333316	0.71572722
2_45461	1	19417671	0.688373268
2_43790	1	19444480	1.622329561
2_42919	1	19463073	0.150132395
2_43251	1	19491972	0.433574293
2_30182	1	19520391	0.123822588
2_30181	1	19522921	0.123822588
2_44886	1	19531326	0.123822588
2_55290	1	19549244	0.572140779
2_49906	1	19560491	0.206579831
2_30323	1	19563331	0.572140779
2_16628	1	19563682	0.572140779
2_44493	1	19569824	0.004979394
2_42717	1	19585861	0.572140779
2_39628	1	19621273	0.3214361
2_42308	1	19634263	0.572140779
2_37674	1	19635160	0.572140779
2_38113	1	19669828	0.572140779
2_38114	1	19678605	0.004979394
2_40632	1	19685373	0.139554182
2_31079	1	19723601	0.051675076
2_47184	1	19727464	0.191377217
2_42526	1	19731392	0.191377217
2_48376	1	19741354	0.191377217
2_38004	1	19754404	0.662121622
2_46580	1	19774462	1.432150549
2_45982	1	19778248	0.662121622
2_54230	1	19789879	0.051675076
2_44167	1	19814892	0.662121622
2_51955	1	19834565	0.726373794
2_45392	1	19841077	0.666593033
2_01607	1	19865351	0.051675076
2_01606	1	19866164	0.051675076
2_41699	1	19903433	0.12696437
2_53177	1	19909854	0.065027114
2_02049	1	19928548	0.051675076
2_25359	1	19928859	0.662121622
2_25358	1	19929435	0.662121622
2_43670	1	19934847	0.210116233
2_52672	1	19941672	0.051675076
2_54492	1	19943207	0.210116233
2_28069	1	19949254	0.051675076
2_46760	1	19981105	0.662121622
2_33395	1	19988012	0.051675076
2_38609	1	19994909	0.156979125
2_38610	1	19998608	1.428524096
2_53075	1	20010779	0.013922797
2_47537	1	20022397	0.051675076
2_46033	1	20060064	0.654136371
2_51979	1	20065843	0.24604944
2_51662	1	20068331	0.233037197
2_42924	1	20081749	0.234480457
2_19054	1	20085917	0.654136371
2_32219	1	20086155	0.654136371
2_47682	1	20147809	0.140789627
2_48742	1	20149917	0.654136371
2_44905	1	20156382	0.140789627
2_43622	1	20165708	0.217986279
2_21628	1	20192375	0.08639805
2_21629	1	20193133	0.463984765
2_18410	1	20221801	0.167127199
2_29426	1	20238122	0.577000023
2_13444	1	20239971	0.577000023
2_42663	1	20264998	0.72090367
2_06229	1	20266621	0.72090367
2_06228	1	20267339	0.23268084
2_44070	1	20297605	0.296287432
2_31036	1	20312396	0.23268084
2_13928	1	20318182	0.23268084
2_29578	1	20319510	0.247605792
2_29579	1	20320596	0.963970269
2_29580	1	20321333	0.963970269
2_29581	1	20321948	0.23268084
2_46323	1	20340114	0.23268084
2_23986	1	20349316	0.23268084
2_23418	1	20363093	0.23268084
2_47518	1	20368599	0.767842812
2_24523	1	20386795	0.350713832
1_1148	1	20403978	0.963970269
2_13651	1	20403978	0.963970269
2_41305	1	20407164	0.23268084
2_01912	1	20441267	0.794281502
2_46665	1	20442690	0.132037804
2_52390	1	20456830	0.878932833
2_55014	1	20485479	0.194601101
2_49673	1	20486615	0.878932833
2_23964	1	20497883	0.649209453
2_23965	1	20498579	0.194601101
2_41448	1	20504663	0.649209453
2_30776	1	20513662	0.878932833
2_33046	1	20519072	0.358634973
2_14752	1	20519793	0.194601101
2_26987	1	20565472	0.154374922
2_26986	1	20570224	0.154374922
2_01572	1	20582954	0.323233252
2_01571	1	20587374	0.867708284
2_28449	1	20616679	0.626095408
2_48269	1	20638187	0.544180976
2_52065	1	20673263	0.201425311
2_20870	1	20674800	0.568909767
2_53225	1	20679268	0.214506445
2_46882	1	20679650	0.214506445
2_43725	1	20691460	0.401756808
2_50212	1	20695931	0.214506445
2_38598	1	20712434	0.214506445
2_47487	1	20728094	0.612806006
2_40088	1	20751154	0.214506445
2_41965	1	20760566	0.214506445
2_42576	1	20810960	0.214506445
2_46993	1	20813255	0.214506445
2_43559	1	20817635	0.401756808
2_54020	1	20818866	0.214506445
2_23137	1	20856734	0.360971953
2_31815	1	20857117	0.18242802
2_46725	1	20868340	0.170342502
2_31609	1	20874434	0.535182694
2_31608	1	20875113	0.67123317
2_55333	1	20876395	0.67123317
2_53036	1	20889089	0.024099682
2_53764	1	20899580	0.142456439
2_37496	1	20902683	1.221993539
2_39586	1	20909488	0.994776575
2_55074	1	20930238	0.994776575
2_52342	1	20952918	0.994776575
2_38135	1	20967893	1.319120826
2_06419	1	20976108	1.427128398
2_06418	1	20976950	1.810509686
2_43272	1	20990389	1.756218084
2_16820	1	21001284	1.427128398
2_16821	1	21002699	1.428524096
2_55051	1	21013566	1.427128398
2_53444	1	21022866	1.810509686
2_02492	1	21036602	0.242429377
2_02491	1	21037310	0.242429377
2_49655	1	21050094	0.242429377
2_43156	1	21055247	0.223880201
2_50512	1	21095590	0.64105678
2_01192	1	21106993	0.242429377
2_32487	1	21107233	1.427128398
2_40466	1	21125900	0.584659327
2_43203	1	21128361	1.245269531
2_46924	1	21138453	0.584659327
2_38992	1	21144152	0.242429377
2_46591	1	21170179	0.242429377
2_51527	1	21198320	1.600845666
2_43422	1	21204425	1.245269531
2_43506	1	21216545	0.476591738
2_39316	1	21251175	0.328484672
2_22098	1	21272040	0.328484672
2_22097	1	21273226	0.328484672
2_33690	1	21287665	0.160679106
2_55516	1	21297468	0.260696701
2_38056	1	21303871	0.160679106
2_38057	1	21312953	0.328484672
2_04564	1	21328283	0.160679106
2_26417	1	21334545	0.199661032
2_30628	1	21356010	0.328484672
2_30627	1	21356998	0.328484672
2_02517	1	21383206	0.22260218
2_02518	1	21383706	0.015886927
2_50575	1	21387666	0.106066329
2_44010	1	21406197	0.106066329
2_54666	1	21418759	0.106066329
2_51284	1	21420940	0.106066329
2_51691	1	21439697	0.106066329
2_12434	1	21445164	0.015886927
2_33952	1	21463287	0.033956875
2_27037	1	21463396	0.033956875
2_30524	1	21487516	0.033956875
2_30525	1	21489181	0.079913214
2_40331	1	21494951	0.033956875
2_45053	1	21514123	0.301786326
2_43329	1	21580326	0.030695938
2_43659	1	21642254	0.159630396
2_43994	1	21718880	0.033956875
2_49850	1	21719429	0.033956875
2_32965	1	21726717	0.033956875
2_55362	1	21733799	0.033956875
2_54487	1	21736355	0.079913214
2_44967	1	21741054	0.033956875
2_46599	1	21762249	0.033956875
2_17099	1	21776931	0.033956875
2_17100	1	21779106	0.033956875
2_38573	1	21786274	0.033956875
2_45354	1	21794182	0.033956875
2_30916	1	21825690	0.033956875
2_39344	1	21826898	0.033956875
1_0382	1	21828568	0.033956875
2_46535	1	21835171	0.033956875
2_22338	1	21850188	0.033956875
2_20208	1	21854215	0.033956875
2_44465	1	21864465	0.033956875
2_44641	1	21870192	0.033956875
2_45774	1	21878608	0.026738183
2_25106	1	21895605	0.141071993
2_25105	1	21896900	0.033956875
2_54284	1	21923290	0.079913214
2_53350	1	21925733	0.029829853
2_25989	1	21931873	0.033956875
2_38899	1	21951644	0.068862629
2_38898	1	21955368	0.068862629
2_51046	1	21961284	0.068862629
2_06194	1	21963108	0.433538938
2_06195	1	21963366	0.068862629
2_34338	1	21982604	0.068862629
2_22180	1	22022824	0.12465509
2_22179	1	22023121	0.12465509
2_39150	1	22049221	0.12465509
2_07207	1	22071720	0.434600869
2_27379	1	22072011	0.434600869
2_52484	1	22078974	0.460974112
2_46525	1	22082381	0.417198282
2_54258	1	22092577	0.12465509
2_23010	1	22098459	0.312310549
2_52624	1	22100261	0.946268684
2_49534	1	22101950	0.311446706
2_50678	1	22108205	0.325680918
2_46148	1	22124895	0.521462362
2_15808	1	22132165	0.012606372
2_15809	1	22132794	0.276971444
2_15810	1	22133653	0.127983657
2_33087	1	22134217	0.12879497
2_53486	1	22138818	0.325680918
2_43888	1	22140438	0.127983657
2_43231	1	22148131	0.12879497
2_02603	1	22158908	0.247728697
2_11497	1	22172885	0.27186545
2_11496	1	22173920	0.217147713
2_44681	1	22216710	0.217147713
2_42303	1	22240480	0.27186545
2_52953	1	22243032	0.27186545
2_54338	1	22269215	0.227150418
2_52398	1	22293549	0.27186545
2_40448	1	22296574	0.217147713
2_41311	1	22310593	0.115363208
2_49496	1	22314062	0.12879497
2_08622	1	22318020	0.217147713
2_08621	1	22318506	0.115363208
2_51025	1	22324939	0.277144052
2_11076	1	22330770	0.27186545
2_18321	1	22333121	0.217147713
2_40175	1	22344755	0.115363208
2_39779	1	22359045	0.211428643
2_31464	1	22381318	0.010656989
2_34654	1	22381371	0.27186545
2_50400	1	22382996	0.217147713
2_31751	1	22390498	0.217147713
2_42455	1	22412159	0.130997226
2_54283	1	22427067	0.157041469
2_40142	1	22434406	0.157041469
2_39920	1	22444235	0.157041469
2_49075	1	22468985	0.12879497
2_48679	1	22479039	0.12879497
2_32042	1	22503819	0.157041469
2_44354	1	22532357	0.12879497
2_53391	1	22534576	0.157041469
2_24886	1	22560884	0.128654779
2_24885	1	22561308	0.367846516
2_01062	1	22562349	0.128654779
2_24884	1	22562658	0.128654779
2_21453	1	22564271	0.128654779
2_21452	1	22564799	0.128654779
2_42557	1	22576445	0.296459297
2_49393	1	22586515	0.063717541
2_29404	1	22602097	0.222783488
2_13374	1	22602697	0.488410723
2_54754	1	22623331	0.287982
2_37514	1	22625683	0.224287634
2_43857	1	22637786	0.131161671
2_15510	1	22644029	0.131161671
2_15511	1	22645706	0.4050663
2_43347	1	22656863	0.131161671
2_41323	1	22679627	0.406105018
2_07065	1	22681218	0.500697906
2_07064	1	22681711	0.500697906
2_17043	1	22690040	0.424812155
2_50176	1	22732627	0.424812155
2_46498	1	22734450	0.055014233
2_54519	1	22756776	0.008875863
2_01449	1	22775315	0.421750569
2_01450	1	22775753	0.424812155
2_53178	1	22777097	0.424812155
2_45451	1	22784347	0.008875863
2_49254	1	22786953	0.061640413
2_53914	1	22790904	0.061640413
2_23493	1	22799590	0.424812155
2_23492	1	22799921	0.424812155
2_23491	1	22801266	0.424812155
2_23490	1	22802082	0.286375073
2_44583	1	22820274	0.146210559
2_54036	1	22821187	0.202213279
2_46683	1	22828413	0.061640413
2_01659	1	22832250	0.424812155
2_01660	1	22832716	0.008875863
2_39869	1	22857491	0.424812155
2_14749	1	22868897	0.030635349
2_14748	1	22869406	0.032967118
2_54840	1	22874299	0.030635349
2_10679	1	22878970	0.511280111
2_48975	1	22906829	0.511280111
2_38567	1	22919646	0.596930979
2_38566	1	22922169	0.294273095
2_49295	1	22927641	0.960625544
2_45787	1	22943894	0.960625544
2_49432	1	22946513	0.960625544
2_43701	1	22975985	0.511280111
2_44988	1	23001015	0.03606114
2_43260	1	23018217	0.056614319
2_07049	1	23028168	0.277958701
2_07050	1	23028728	0.834874431
2_25419	1	23048187	0.09560908
2_38399	1	23087253	0.384418151
2_40195	1	23097631	0.262616501
2_41877	1	23123410	0.263109719
2_53406	1	23124904	0.263109719
2_38758	1	23127830	0.263109719
2_51172	1	23139075	0.262616501
2_51577	1	23144929	0.263109719
2_55046	1	23148443	0.263109719
2_10413	1	23157868	0.123285777
2_46097	1	23181198	0.902534446
2_22812	1	23183842	0.263109719
2_22813	1	23184303	0.263109719
2_24014	1	23192092	0.263109719
2_24015	1	23194800	0.263109719
2_02751	1	23210079	0.262616501
2_02752	1	23210428	0.263109719
2_04238	1	23243592	0.164417223
2_26262	1	23244115	0.164417223
2_15299	1	23254991	0.262616501
2_15300	1	23255585	0.263109719
2_15301	1	23256194	0.262616501
2_15302	1	23257508	0.263109719
2_45630	1	23271439	0.164417223
2_40146	1	23306421	0.262616501
2_31072	1	23311981	0.263109719
2_19924	1	23312672	0.263109719
2_21158	1	23317697	0.03990041
2_21157	1	23317994	1.188961491
2_43788	1	23342645	1.348721986
2_27296	1	23353752	1.224462365
2_45418	1	23356108	1.083598696
2_39725	1	23359005	1.289967301
2_46461	1	23364721	1.169218924
2_05478	1	23389653	1.340939928
2_05477	1	23389801	1.340939928
2_05479	1	23390628	0.561172961
2_40177	1	23407878	1.345630909
2_53762	1	23415581	1.078781879
2_30750	1	23445431	0.294290199
2_42595	1	23467347	1.406160339
2_47817	1	23532530	1.461551948
2_18418	1	23539230	1.466863712
2_04243	1	23580739	0.004206909
2_04244	1	23581773	0.537512157
2_46693	1	23586496	0.537512157
2_46011	1	23589820	0.537512157
2_40210	1	23606947	0.20451624
2_46491	1	23611378	0.3341377
2_06781	1	23624526	0.3341377
2_06780	1	23626175	0.049489107
2_26975	1	23643216	0.3341377
2_26976	1	23643567	0.3341377
2_17665	1	23669254	0.3341377
2_17666	1	23669509	0.3341377
2_38933	1	23679085	0.056545057
2_49579	1	23697054	0.243751964
2_44608	1	23703977	0.175926259
2_30485	1	23718464	0.28409689
2_30484	1	23719480	0.28409689
2_46328	1	23758761	0.398092038
2_45890	1	23774441	0.398092038
2_43327	1	23785003	0.395244905
2_41868	1	23810256	0.388914267
2_53890	1	23823532	0.398092038
2_51986	1	23827592	0.398092038
2_48354	1	23829517	0.398092038
2_37680	1	23838305	0.398092038
2_37681	1	23840757	0.398092038
2_13395	1	23843042	0.398092038
2_13396	1	23843783	0.401975928
2_39937	1	23858641	0.401975928
2_21632	1	23860755	0.403798898
2_21633	1	23861411	0.401975928
2_43640	1	23871927	0.006070233
2_14628	1	23880649	0.401975928
1_1360	1	23880947	0.066907705
2_14629	1	23881424	0.064522965
2_50246	1	23885213	0.380583157
2_47388	1	23894809	1.324496615
2_20336	1	23896766	1.324496615
2_31190	1	23897416	1.637140697
2_25744	1	23900715	1.820161072
2_25743	1	23901179	1.324496615
2_50630	1	23912300	1.324496615
2_31220	1	23914035	1.324496615
2_20479	1	23914545	1.324496615
2_23564	1	23916858	1.317133204
2_31876	1	23918318	1.324496615
2_52384	1	23922802	1.324496615
2_39167	1	23923627	1.368657714
2_44394	1	23941679	1.324496615
2_19264	1	23945754	1.098923284
2_19263	1	23946053	1.324496615
2_27631	1	23948423	1.324496615
2_07805	1	23948934	1.324496615
2_47763	1	23950997	1.324496615
2_40157	1	23956961	1.324496615
2_39202	1	23969805	1.324496615
2_52255	1	23972179	1.088043811
2_54942	1	23977514	1.466355021
2_53564	1	23981722	1.191856574
2_47161	1	23992974	1.129069642
2_54398	1	24021527	1.630598586
2_26513	1	24040783	1.265680319
2_46320	1	24045727	1.447696891
2_52776	1	24064301	1.446845452
1_0504	1	24069433	1.103970088
2_00019	1	24069433	1.103970088
2_00018	1	24069911	1.508638306
2_55166	1	24074254	0.256662733
2_42488	1	24084473	1.140981856
2_52203	1	24087687	1.514704561
2_03996	1	24104087	1.603103551
2_39407	1	24117872	1.2367967
2_17889	1	24129094	1.132827249
2_17888	1	24129421	1.2142432
2_07650	1	24132311	1.242983765
2_27562	1	24132753	1.242983765
2_45284	1	24137209	1.2142432
2_52916	1	24151858	1.186152246
2_48574	1	24153108	1.132827249
2_28968	1	24157413	1.163675884
2_11857	1	24158166	1.311847244
2_47436	1	24173801	1.132827249
2_41167	1	24175261	1.131414333
2_45536	1	24185145	1.176199846
2_00449	1	24204017	1.176199846
2_00450	1	24205161	1.176199846
2_53507	1	24217322	1.176199846
2_09926	1	24236268	1.294906389
2_09925	1	24236578	1.294906389
2_23524	1	24256094	1.085445301
2_23525	1	24257350	0.813750179
2_47842	1	24262433	1.085445301
2_19576	1	24281818	1.085445301
2_01239	1	24329319	1.079824478
2_06677	1	24348631	0.757483418
2_46847	1	24367885	0.716721391
2_13433	1	24372459	1.076289806
2_13432	1	24372756	1.080608073
2_13431	1	24375687	1.153168247
2_13430	1	24376174	1.153168247
2_04024	1	24410052	1.076289806
2_04023	1	24410964	1.076289806
2_26156	1	24417906	1.153168247
2_26155	1	24422937	1.153168247
2_13057	1	24436097	1.076289806
2_44220	1	24451621	1.076289806
2_15966	1	24459346	1.076911485
2_15965	1	24460990	1.105960999
2_49665	1	24461917	1.105960999
2_51629	1	24469595	0.322219729
2_01901	1	24495571	1.056505484
2_01900	1	24496688	1.077897633
2_49338	1	24512353	1.077897633
2_14907	1	24519731	1.077897633
2_14906	1	24520274	1.077897633
2_48621	1	24521677	1.077897633
2_14909	1	24524807	1.077897633
2_14908	1	24526390	1.077897633
2_52898	1	24532894	1.077897633
2_12428	1	24545880	1.077897633
2_12429	1	24547274	1.077897633
2_18414	1	24555281	1.077897633
2_09446	1	24573373	1.077897633
2_09445	1	24574829	1.077897633
2_12190	1	24577892	1.077897633
2_12189	1	24578444	1.077897633
2_44619	1	24599772	1.077897633
2_11962	1	24605570	1.705754284
2_23103	1	24623759	1.07654873
2_23102	1	24624219	0.302666021
2_45027	1	24630323	1.095284455
2_07499	1	24633703	0.156817072
2_07500	1	24633998	0.156817072
2_27494	1	24640675	1.385208208
2_19365	1	24651236	1.198253381
2_19366	1	24651520	1.681936665
2_21193	1	24654879	1.14308994
2_21194	1	24655195	0.566742344
2_22639	1	24664539	1.326979093
2_22638	1	24665615	1.326979093
2_23946	1	24688823	0.561600066
2_23945	1	24689244	0.312667274
2_23944	1	24690079	0.038436538
1_1499	1	24700304	0.453296973
2_01569	1	24701369	0.168853586
2_07344	1	24714677	0.300283651
2_07343	1	24716421	0.453296973
2_48401	1	24729657	0.077959992
2_31149	1	24745099	0.219934839
2_18396	1	24758197	0.843966008
2_41628	1	24768194	0.140219446
2_48587	1	24794142	0.773761083
2_40647	1	24806509	0.736056366
2_39826	1	24811389	0.208414605
2_37643	1	24822371	0.249190866
2_17306	1	24850706	0.836540448
2_17307	1	24850952	0.369378922
2_54641	1	24852337	0.947652401
2_52911	1	24864489	0.779081636
2_40579	1	24870801	1.084864093
2_09139	1	24901489	0.435156467
2_09140	1	24901891	0.903541888
2_43180	1	24919224	0.422611616
2_46985	1	24949291	0.227619609
2_29079	1	24951623	0.735678122
2_12261	1	24951948	0.212893907
2_29080	1	24952405	0.276733193
2_12262	1	24953540	0.847987
2_53574	1	24966449	0.538111474
2_22731	1	24976789	0.267622325
2_30751	1	24982491	0.75131576
2_05159	1	25019119	0.513853003
2_40211	1	25028201	0.465085896
2_19979	1	25053043	0.371416958
2_49699	1	25057434	0.720629682
2_31257	1	25059597	0.125460203
2_53737	1	25069056	0.837405726
2_20088	1	25092003	0.77334855
2_20089	1	25092305	0.77334855
2_48739	1	25093398	0.522213337
2_09442	1	25098071	0.352636593
2_34114	1	25098287	0.352636593
2_45055	1	25105647	0.135227946
2_05349	1	25123353	0.097915482
2_05348	1	25124433	0.097915482
2_02194	1	25137456	0.553633726
2_02193	1	25138711	0.010327752
2_53194	1	25148741	0.733133559
2_52606	1	25152931	0.733133559
2_49339	1	25168923	0.733133559
2_31754	1	25170440	0.733133559
2_22801	1	25171593	0.021874287
2_47351	1	25172919	0.733133559
2_54061	1	25183971	1.286173576
2_32153	1	25196655	0.488838836
2_15291	1	25196883	0.099086932
2_13576	1	25206612	0.063380713
2_29475	1	25208442	0.055991362
2_50160	1	25211354	0.245789315
2_26433	1	25222576	0.09669292
2_04623	1	25222846	0.390320234
2_08469	1	25242385	0.27990688
2_08468	1	25246244	0.007256547
2_08551	1	25263019	0.640278322
2_08552	1	25264360	0.109193485
2_15490	1	25272492	0.78922682
2_07980	1	25278776	0.300595918
2_07981	1	25279287	0.255847892
2_48246	1	25284159	0.255847892
2_06713	1	25303665	0.796640698
2_53230	1	25316122	0.78922682
2_14665	1	25319166	0.281506615
2_14010	1	25323481	0.150058764
2_34531	1	25332781	0.737667586
2_19020	1	25332894	0.330552944
2_51863	1	25333903	0.658684205
2_31698	1	25348015	0.4069134
2_22530	1	25349152	0.347792351
2_07451	1	25362465	0.386274428
2_07452	1	25362744	1.13053359
2_04971	1	25372765	0.386274428
2_29660	1	25378672	1.13053359
2_14132	1	25379555	0.426130899
2_17122	1	25412370	0.873933563
2_17121	1	25415436	0.221053272
2_16182	1	25422956	0.426130899
2_30517	1	25432366	0.5104071
2_39935	1	25443308	0.426130899
2_22008	1	25445288	0.426130899
2_22007	1	25446746	0.365915889
2_00353	1	25478791	0.426130899
2_00354	1	25484047	0.5104071
2_42661	1	25488214	0.565431096
2_51258	1	25491426	0.6345869
2_12043	1	25503740	0.5104071
2_12042	1	25504382	0.365915889
2_47290	1	25521632	0.213575131
2_13484	1	25524674	0.172805255
2_13485	1	25525541	0.570829321
2_12570	1	25565641	0.220288097
2_44985	1	25582019	0.242239681
2_17331	1	25597702	0.032751641
1_1138	1	25598341	0.658882161
2_17332	1	25599560	0.280138601
2_20390	1	25601375	0.254636296
2_20389	1	25602355	0.272645839
2_07979	1	25613338	0.308290959
2_27695	1	25614541	0.234286752
2_05366	1	25634668	0.770932798
2_05365	1	25639660	0.746443933
2_20911	1	25643379	0.457709994
2_31348	1	25643645	0.309130842
2_12811	1	25647410	0.698601011
2_12812	1	25647664	0.124146149
2_32967	1	25656742	0.399528084
2_02095	1	25671075	0.263428222
2_02096	1	25671496	0.263428222
2_51849	1	25688399	0.815876646
2_40974	1	25690846	0.131573057
2_36553	1	25703999	0.215382707
2_34970	1	25704918	0.170612593
2_47796	1	25784028	0.131332055
2_05811	1	25785963	0.030383762
2_49327	1	25800335	0.100272492
2_03541	1	25808230	0.354086725
2_25990	1	25810479	0.354086725
2_24484	1	25838942	0.016942321
2_48105	1	25939230	0.206740589
2_35570	1	25949484	0.028733431
2_49791	1	26006627	0.331837812
2_53793	1	26012450	0.331837812
2_55205	1	26040390	0.025345562
2_16814	1	26048335	0.150089442
2_16815	1	26049789	0.023420781
2_52877	1	26194777	1.094473952
2_40441	1	26223890	0.033074897
2_26165	1	26235575	0.019110753
2_04008	1	26236050	0.089210232
2_26166	1	26236765	0.052061692
2_04007	1	26236971	0.061390223
2_04006	1	26237451	0.052061692
2_38014	1	26257990	0.624263248
2_54184	1	26266008	0.292446855
2_05459	1	26266841	0.206195651
2_05460	1	26268013	0.206195651
2_01755	1	26278313	0.206195651
2_25210	1	26279120	0.324212496
2_55509	1	26283717	0.206195651
2_40135	1	26285715	0.206195651
2_47490	1	26301955	0.206195651
2_11380	1	26303277	0.206195651
2_11381	1	26308109	0.206195651
2_54598	1	26314456	0.324212496
2_44175	1	26315987	0.206195651
2_50182	1	26338390	0.1639672
2_31219	1	26342590	0.206195651
2_44686	1	26347280	0.225702062
2_20952	1	26350076	0.206195651
2_20951	1	26350828	0.206195651
2_21985	1	26354340	0.206195651
2_21986	1	26355043	0.206195651
2_32264	1	26385948	0.225702062
2_20218	1	26386092	0.206195651
2_51814	1	26397176	0.206195651
2_51737	1	26398832	0.206195651
2_19841	1	26409302	0.624263248
2_31047	1	26410155	0.206195651
2_02441	1	26442026	0.237734175
2_02442	1	26446104	0.206195651
2_31645	1	26481381	0.250008746
2_02815	1	26508250	0.68630147
2_00592	1	26553049	0.734781112
2_26171	1	26607755	0.044856059
2_32677	1	26617356	0.271897938
2_43290	1	26702429	0.008649858
2_53515	1	26723193	0.097203261
2_48318	1	26752489	0.547952759
2_26145	1	26784846	1.245193145
2_45564	1	26910660	0.016468429
2_00245	1	26912092	0.403249004
2_53071	1	26919789	0.246700436
1_0155	1	26924949	0.034168253
2_51024	1	26961883	1.144178095
2_26487	1	26982283	0.044880137
2_27649	1	26998550	0.004794926
2_55598	1	27001598	0.182619757
2_29983	1	27051139	1.122743867
2_32793	1	27059711	0.182216546
2_12312	1	27096714	0.047590214
2_46059	1	27102322	0.07615005
2_52544	1	27112416	0.173730781
2_23572	1	27165108	0.04522701
2_23571	1	27165405	0.04522701
2_24033	1	27179072	0.04522701
2_24034	1	27179338	0.04522701
2_09840	1	27198723	0.194941137
2_03285	1	27242618	0.280444993
2_21671	1	27254299	0.253412502
2_46664	1	27266113	0.030481584
2_25311	1	27285048	0.194118706
2_11013	1	27302270	0.194118706
2_35115	1	27325669	0.018353514
2_32569	1	27358366	0.099736677
2_47861	1	27409531	0.095446737
2_38591	1	27473945	0.166808249
2_34327	1	27510499	0.505581012
2_31808	1	27513884	0.168776712
2_31807	1	27516492	0.283370721
2_13410	1	27522739	0.150703459
2_51231	1	27577416	1.188626103
2_38808	1	27648100	0.162714664
2_51494	1	27704236	0.662001949
2_28284	1	27717266	0.50859628
2_35787	1	27814880	0.532169995
2_49783	1	27855223	0.057967131
2_35598	1	27872752	0.58983036
2_30804	1	27899626	0.458146289
2_50751	1	27900691	0.458146289
2_16903	1	27904151	0.384628692
2_16904	1	27905376	0.442865898
2_35504	1	27957912	0.21334084
2_35505	1	27958247	0.266931196
2_50078	1	27980439	0.065915841
2_37302	1	28008239	0.753279897
2_33784	1	28024448	0.049343117
2_33856	1	28025952	0.081607902
2_34051	1	28034637	0.651130726
2_08257	1	28036852	0.651130726
2_46959	1	28044896	0.133689026
2_32573	1	28063351	0.651130726
2_03486	1	28069980	0.651130726
2_28149	1	28078655	0.651130726
2_26343	1	28088822	0.641284886
2_02627	1	28094660	0.641284886
2_02626	1	28095730	0.2169258
2_30033	1	28105507	0.641284886
[truncated: 39,516 more rows]
